# Supplementary material for: Respiration rates of marine prokaryotes and implications for the in vivo INT method
Source: Copernicus journal article supplement (doi:10.5194/egusphere-2025-3009), 2025-07-04
Supplement: Supplementary file [file egusphere-2025-3009-RC2-supplement.pdf]

1)

### Summary

The study demonstrates that all tested prokaryoplankton species import and reduce INT. Still, the O<sub>2</sub> consumed and INT reduced ratio is species-dependent, making it impossible to assume a single universal conversion factor.

The authors quantify species-specific toxicity and adjust incubation times (5–20 min) to avoid bias, also showing good agreement between O<sub>2</sub> measured by optodes and by Winkler titration.

In copiotrophs (*Halomonas*, *Ruegeria*, *Agrococcus*) the INTR–O<sub>2</sub>C relationship has a strong linear fit; in oligotrophs and cyanobacteria (SAR11, *Synechococcus*, *Prochlorococcus*), the fit is significantly weaker, but the linear model lies within the model for natural plankton communities (Fig. 4).

The conclusion is that in situ studies must derive the O<sub>2</sub>C/INTR relationship locally and check for toxicity in the studied community.

2)

### Scientific questions

The study addresses the quantification of prokaryotic plankton respiration and the validity of the in vivo INT method.

### Novelty

- Comparative multi-taxa dataset under controlled conditions.
- Derivation and comparison of slopes/intercepts per species,
- An operational framework to define toxicity and optimal incubation times.

### Conclusions

Conclusions are well supported: no single O<sub>2</sub>C/INTR factor exists, and studies must derive species-specific relationships (especially in eutrophic systems dominated by copiotrophs).

### Methods and assumptions

- Robust, O<sub>2</sub> measured by optodes and Winkler titration, avoiding hypoxia.
- INTR with INT 0.2 mM, killed and media controls, propanol extraction, and calibration curve.
- Quantitative toxicity criterion and choice of incubation.
- Per-cell rates calculated from FC/CFU counts.

### Support for results

- Toxicity curves (Appendix A), per-cell rates (Appendix B with Winkler and optodes), and species-specific relationships are presented.
- Table 1 with toxicity, abundance, and O<sub>2</sub>C/INTR values from replicates per species.

**Traceability and reproducibility**

Solutions, equipment, calibrations, and regression models.

The authors declare the availability of the data in the public BODC repository and provide a DOI.

However, at the time of this review, the dataset could not be accessed through the provided link.

Authors are requested to verify the DOI and ensure the data are fully accessible to the public before final publication.

**Credit and originality**

Context and limitations of the method (classic ETS, constant O<sub>2</sub>C/INTR assumption) are well referenced and contrasted; the authors' contribution (species test and comparative analysis) is clearly stated.

**Title**

Clear. Respiration rates of marine prokaryotes and implications for the in vivo INT method.

**Abstract**

Complete. States the problem, approach, organisms, main finding (O<sub>2</sub>C/INTR variability), and methodological implications.

**Structure and clarity**

Introduction–Methods–Results–Discussion–Conclusions–Appendices. Figures and tables are well integrated with clear cross-referencing.

**Language**

Technical English is fluent and precise.

**Mathematical formulation and symbols**

Units are consistent, equations and parameters are defined.

**References**

Appropriate in number and quality, covering the state of the art.

## **Supplementary material**

Pertinent:

Appendix A (toxicity curves) and Appendix B (per-cell O<sub>2</sub> rates).

### **3) Major comments**

#### *Ecological generalization and growth media*

Although the discussion notes possible effects of growth medium and respiratory chain diversity, extrapolation to natural communities could be strengthened with an analysis showing how much slopes/intercepts vary across media.

#### *Underlying physiological mechanisms*

The discussion proposes several hypotheses (cell wall, AOX, etc.) to explain the observed variability. To unify these ideas, the creation of a conceptual diagram is recommended. This figure would serve as a visual summary, linking the proposed mechanisms with their theoretical effects on the O<sub>2</sub>C and INTR.

### **4) Editorial recommendation**

- Accept with minor revisions. The manuscript provides new and relevant evidence for the *in vivo* INT method, and the conclusions are well supported and do not require new experiments.
